# Supplementary material
Source: PubMed Central journal article supplement (PMC8320488)
Supplement: jcsm.9102.ds001.pdf [file jcsm.9102.ds001.pdf]

Table S1. Intention to treat analysis of outcomes at baseline and at the end of weeks 6 and 22 (poor sleeps at baseline only)

|                                    | Intervention (n=61)     |                                            |                | Control (n=63)          |                                            |                | Between-group difference at each time point |                | Group × time interaction effect <i>P</i> value |
|------------------------------------|-------------------------|--------------------------------------------|----------------|-------------------------|--------------------------------------------|----------------|---------------------------------------------|----------------|------------------------------------------------|
|                                    | Mean (95% CI)           | Within-group change from baseline (95% CI) | <i>P</i> value | Mean (95% CI)           | Within-group change from baseline (95% CI) | <i>P</i> value | Mean (95% CI)                               | <i>P</i> value |                                                |
| <b>GSDS total score</b>            |                         |                                            |                |                         |                                            |                |                                             |                | 0.04                                           |
| Baseline                           | 60.20<br>(56.66, 63.74) |                                            |                | 62.43<br>(58.94, 65.91) |                                            |                | -2.23<br>(-7.20, 2.74)                      | 0.38           |                                                |
| Week 6                             | 48.66<br>(44.04, 53.29) | -11.53<br>(-16.60, -6.47)                  | <0.001         | 58.01<br>(53.58, 62.44) | -4.42<br>(-9.24, 0.40)                     | 0.08           | -9.35<br>(-15.75, -2.94)                    | 0.005          |                                                |
| Week 22                            | 47.01<br>(42.34, 51.68) | -13.19<br>(-18.15, -8.23)                  | <0.001         | 54.08<br>(49.60, 58.56) | -8.35<br>(-13.06, -3.64)                   | <0.001         | -7.07<br>(-13.54, -0.60)                    | 0.03           |                                                |
| <b>GSDS subscale scores</b>        |                         |                                            |                |                         |                                            |                |                                             |                |                                                |
| <b>Difficulty getting to sleep</b> |                         |                                            |                |                         |                                            |                |                                             |                | 0.01                                           |
| Baseline                           | 3.25<br>(2.72, 3.78)    |                                            |                | 3.27<br>(2.75, 3.79)    |                                            |                | -0.02<br>(-0.77, 0.72)                      | 0.95           |                                                |
| Week 6                             | 2.14<br>(1.58, 2.70)    | -1.11<br>(-1.78, -0.43)                    | <0.001         | 3.32<br>(2.79, 3.86)    | 0.05<br>(-0.06, 0.70)                      | 1.00           | -1.18<br>(-1.96, -0.41)                     | 0.003          |                                                |
| Week 22                            | 2.08<br>(1.56, 2.61)    | -1.16<br>(-1.78, -0.45)                    | <0.001         | 2.73<br>(2.23, 3.24)    | -0.54<br>(-1.22, 0.15)                     | 0.18           | -0.65<br>(-1.38, 0.08)                      | 0.08           |                                                |
| <b>Waking up during sleep</b>      |                         |                                            |                |                         |                                            |                |                                             |                | 0.47                                           |
| Baseline                           | 4.49<br>(3.96, 5.02)    |                                            |                | 4.65<br>(4.13, 5.17)    |                                            |                | -0.16<br>(-0.91, 0.59)                      | 0.67           |                                                |



|          |                      |                         |        |                      |                         |       |                             |      |  |
|----------|----------------------|-------------------------|--------|----------------------|-------------------------|-------|-----------------------------|------|--|
| Baseline | 3.70<br>(3.43, 3.97) |                         |        | 3.87<br>(3.61, 4.13) |                         |       | -0.17<br>(-0.55, 0.20)      | 0.36 |  |
| Week 6   | 3.02<br>(2.68, 3.36) | -0.68<br>(-1.06, -0.31) | <0.001 | 3.54<br>(3.21, 3.87) | -0.33<br>(-0.69, 0.03)  | 0.08  | -0.52<br>(-1.00, -0.5<br>5) | 0.03 |  |
| Week 22  | 2.87<br>(2.55, 3.18) | -0.83<br>(-1.20, -0.47) | <0.001 | 3.35<br>(3.04, 3.65) | -0.53<br>(-0.88, -0.18) | 0.001 | -0.48<br>(-0.92, -0.0<br>4) | 0.03 |  |

Table S2. Per protocol analysis of outcomes at baseline and at the end of weeks 6 and 22

|                                    | Intervention (n=60)     |                                            |                | Control (n=86)          |                                            |                | Between-group difference at each time point |                |                                   | Group × time interaction effect <i>P</i> value |
|------------------------------------|-------------------------|--------------------------------------------|----------------|-------------------------|--------------------------------------------|----------------|---------------------------------------------|----------------|-----------------------------------|------------------------------------------------|
|                                    | Mean (95% CI)           | Within-group change from baseline (95% CI) | <i>P</i> value | Mean (95% CI)           | Within-group change from baseline (95% CI) | <i>P</i> value | Mean (95% CI)                               | <i>P</i> value | Effect size <sup>a</sup> (95% CI) |                                                |
| <b>GSDS total scale</b>            |                         |                                            |                |                         |                                            |                |                                             |                |                                   | 0.007                                          |
| Baseline                           | 50.27<br>(45.27, 55.26) |                                            |                | 51.80<br>(47.63, 55.98) |                                            |                | -1.54<br>(-8.05, 4.98)                      | 0.64           |                                   |                                                |
| Week 6                             | 40.61<br>(35.94, 45.29) | -9.65<br>(-14.59, -4.72)                   | <0.001         | 50.42<br>(46.50, 54.34) | -1.38<br>(-5.53, 2.76)                     | 1.00           | -9.81<br>(-15.91, -3.70)                    | 0.002          | -0.53<br>(-0.86, -0.19)           |                                                |
| Week 22                            | 40.75<br>(36.12, 45.38) | -9.51<br>(-14.38, -4.65)                   | <0.001         | 48.08<br>(44.23, 51.93) | -3.72<br>(-7.76, 0.32)                     | 0.08           | -7.33<br>(-13.35, -1.31)                    | 0.02           | -0.40<br>(-0.73, -0.07)           |                                                |
| <b>GSDS subscale scores</b>        |                         |                                            |                |                         |                                            |                |                                             |                |                                   |                                                |
| <b>Difficulty getting to sleep</b> |                         |                                            |                |                         |                                            |                |                                             |                |                                   | 0.01                                           |
| Baseline                           | 2.42<br>(1.89, 2.94)    |                                            |                | 2.60<br>(2.17, 3.04)    |                                            |                | -0.19<br>(-0.87, 0.50)                      | 0.59           |                                   |                                                |
| Week 6                             | 1.50<br>(0.98, 2.02)    | -0.92<br>(-1.52, -0.31)                    | 0.001          | 2.66<br>(2.23, 3.10)    | 0.06<br>(-0.45, 0.57)                      | 1.00           | -1.16<br>(-1.84, -0.48)                     | 0.001          | -0.57<br>(-0.90, -0.23)           |                                                |
| Week 22                            | 1.78<br>(1.30, 2.26)    | -0.63<br>(-1.25, -0.02)                    | 0.04           | 2.30<br>(1.90, 2.70)    | -0.30<br>(-0.82, 0.21)                     | 0.47           | -0.52<br>(-1.15, 0.11)                      | 0.10           | -0.27<br>(-0.60, 0.06)            |                                                |
| <b>Waking up during sleep</b>      |                         |                                            |                |                         |                                            |                |                                             |                |                                   | 0.41                                           |
| Baseline                           | 3.67<br>(3.09, 4.25)    |                                            |                | 3.98<br>(3.49, 4.46)    |                                            |                | -0.31<br>(-1.07, 0.45)                      | 0.42           |                                   |                                                |
| Week 6                             | 3.15<br>(2.56, 3.74)    | -0.52<br>(-1.22, 0.18)                     | 0.23           | 3.88<br>(3.39, 4.38)    | -0.09<br>(-0.68, 0.49)                     | 1.00           | -0.73<br>(-1.50, 0.03)                      | 0.06           | -0.31<br>(-0.64, 0.02)            |                                                |
| Week 22                            | 2.82<br>(2.24, 3.39)    | -0.85<br>(-1.61, -0.09)                    | 0.02           | 3.61<br>(3.12, 4.09)    | -0.37<br>(-1.01, 0.27)                     | 0.48           | -0.79<br>(-1.54, -0.04)                     | 0.04           | -0.34<br>(-0.67, -0.01)           |                                                |
| <b>Early waking</b>                |                         |                                            |                |                         |                                            |                |                                             |                |                                   | 0.95                                           |
| Baseline                           | 2.95<br>(2.35, 3.55)    |                                            |                | 3.54<br>(3.04, 4.03)    |                                            |                | -0.59<br>(-1.36, 0.19)                      | 0.14           |                                   |                                                |
| Week 6                             | 2.07<br>(1.49, 2.64)    | -0.88<br>(-1.72, -0.04)                    | 0.04           | 2.78<br>(2.30, 3.26)    | -0.75<br>(-1.45, -0.05)                    | 0.03           | -0.72<br>(-1.46, 0.03)                      | 0.06           | -0.31<br>(-0.64, 0.02)            |                                                |

|                                           |                      |                         |        |                      |                        |      |                         |        |                         |        |
|-------------------------------------------|----------------------|-------------------------|--------|----------------------|------------------------|------|-------------------------|--------|-------------------------|--------|
| Week 22                                   | 2.42<br>(1.85, 2.98) | -0.53<br>(-1.35, 0.28)  | 0.34   | 3.01<br>(2.54, 3.48) | -0.52<br>(-1.20, 0.16) | 0.19 | -0.60<br>(-1.33, 0.14)  | 0.11   | -0.26<br>(-0.59, 0.07)  |        |
| <b>Quality of sleep</b>                   |                      |                         |        |                      |                        |      |                         |        |                         | <0.001 |
| Baseline                                  | 4.55<br>(4.12, 4.98) |                         |        | 4.30<br>(3.94, 4.66) |                        |      | 0.25<br>(-0.31, 0.82)   | 0.38   |                         |        |
| Week 6                                    | 3.62<br>(3.23, 4.01) | -0.93<br>(-1.46, -0.41) | <0.001 | 4.54<br>(4.21, 4.87) | 0.24<br>(-0.20, 0.68)  | 0.56 | -0.92<br>(-1.43, -0.41) | <0.001 | -0.59<br>(-0.93, -0.25) |        |
| Week 22                                   | 3.88<br>(3.50, 4.26) | -0.67<br>(-1.22, -0.13) | 0.01   | 4.04<br>(3.72, 4.36) | -0.26<br>(-0.71, 0.20) | 0.53 | -0.17<br>(-0.66, 0.34)  | 0.52   | -0.11<br>(-0.44, 0.22)  |        |
| <b>Quantity of sleep</b>                  |                      |                         |        |                      |                        |      |                         |        |                         | 0.32   |
| Baseline                                  | 2.26<br>(1.91, 2.61) |                         |        | 2.39<br>(2.10, 2.68) |                        |      | -0.13<br>(-0.58, 0.32)  | 0.57   |                         |        |
| Week 6                                    | 1.83<br>(1.47, 2.18) | -0.43<br>(-0.89, 0.02)  | 0.07   | 2.33<br>(2.03, 2.62) | -0.07<br>(-0.45, 0.32) | 1.00 | -0.50<br>(-0.96, -0.04) | 0.04   | -0.35<br>(-0.68, -0.02) |        |
| Week 22                                   | 2.09<br>(1.74, 2.45) | -0.17<br>(-0.64, 0.31)  | 1.00   | 2.36<br>(2.06, 2.65) | -0.04<br>(-0.43, 0.36) | 1.00 | -0.26<br>(-0.72, 0.20)  | 0.26   | -0.19<br>(-0.52, 0.14)  |        |
| <b>Daytime sleepiness</b>                 |                      |                         |        |                      |                        |      |                         |        |                         | 0.07   |
| Baseline                                  | 3.04<br>(2.69, 3.39) |                         |        | 3.17<br>(2.88, 3.47) |                        |      | -0.13<br>(-0.59, 0.32)  | 0.57   |                         |        |
| Week 6                                    | 2.55<br>(2.22, 2.89) | -0.49<br>(-0.85, -0.13) | 0.004  | 3.03<br>(2.74, 3.31) | -0.15<br>(-0.45, 0.16) | 0.74 | -0.48<br>(-0.92, -0.04) | 0.04   | -0.36<br>(-0.69, -0.02) |        |
| Week 22                                   | 2.41<br>(2.09, 2.72) | -0.63<br>(-0.99, -0.28) | <0.001 | 2.97<br>(2.71, 3.23) | -0.20<br>(-0.50, 0.09) | 0.28 | -0.56<br>(-0.97, -0.15) | 0.01   | -0.45<br>(-0.78, -0.11) |        |
| <b>Self-medication to assist sleeping</b> |                      |                         |        |                      |                        |      |                         |        |                         | 0.80   |
| Baseline                                  | 0.30<br>(0.13, 0.46) |                         |        | 0.30<br>(0.16, 0.44) |                        |      | -0.003<br>(-0.22, 0.21) | 0.98   |                         |        |
| Week 6                                    | 0.22<br>(0.06, 0.39) | -0.075<br>(-0.22, 0.07) | 0.62   | 0.27<br>(0.13, 0.41) | -0.029                 | 1.00 | -0.05<br>(-0.27, 0.17)  | 0.65   | -0.08<br>(-0.41, 0.25)  |        |
| Week 22                                   | 0.27<br>(0.08, 0.46) | -0.026<br>(-0.17, 0.12) | 1.00   | 0.26<br>(0.10, 0.41) | -0.043                 | 1.00 | 0.01<br>(-0.23, 0.26)   | 0.91   | 0.01<br>(-0.32, 0.34)   |        |

Abbreviations. CI is confidence interval; GSDD is the General Sleep Disturbance Scale

<sup>a</sup>computed by dividing the difference between group means by the pooled standard deviation
